# Body Weight and ADHD: Examining the Role of Self-Regulation

Zia Choudhry<sup>1,4</sup>, Sarojini M. Sengupta<sup>2,4</sup>, Natalie Grizenko<sup>2,4,9</sup>, William J. Harvey<sup>3,4</sup>, Marie-Ève Fortier<sup>1,4</sup>, Norbert Schmitz<sup>2,4</sup>, Ridha Joobner<sup>1,2,4,\*9</sup>

**1** Department of Human Genetics, McGill University, Montreal, Canada, **2** Department of Psychiatry, McGill University, Montreal, Canada, **3** Department of Kinesiology and Physical Education, McGill University, Montreal, Canada, **4** Douglas Mental Health University Institute, Montreal, Canada

## Abstract

**Objective:** Attention-Deficit/Hyperactivity Disorder (ADHD) is a complex and heterogeneous childhood disorder that often coexists with other psychiatric and somatic disorders. Recently, a link between ADHD and body weight dysregulation has been reported and often interpreted as impaired self-regulation that is shared between the two conditions. The objective of this study is to investigate the relation between body weight/BMI and cognitive, emotional and motor characteristics in children with ADHD.

**Methods:** 284 ADHD children were stratified by weight status/BMI according to WHO classification and compared with regard to their neurocognitive characteristics, motivational style, and motor profile as assessed by a comprehensive battery of tests. All comparisons were adjusted for demographic characteristics of relevance including, socioeconomic status (SES).

**Results:** Both Obese and overweight ADHD children exhibited significantly lower SES compared to normal weight ADHD children. No significant differences were observed between the three groups with regards to their neurocognitive, emotional and motor profile.

**Conclusions:** Our findings provide evidence that differences in weight/BMI are not accounted for by cognitive, motivational and motor profiles. Socio-economic characteristics are strongly associated with overweight and obesity in ADHD children and may inform strategies aimed at promoting healthier weight.

**Citation:** Choudhry Z, Sengupta SM, Grizenko N, Harvey WJ, Fortier M-È, et al. (2013) Body Weight and ADHD: Examining the Role of Self-Regulation. PLoS ONE 8(1): e55351. doi:10.1371/journal.pone.0055351

**Editor:** James G. Scott, The University of Queensland, Australia

**Received:** August 13, 2012; **Accepted:** December 31, 2012; **Published:** January 29, 2013

**Copyright:** © 2013 Choudhry et al. This is an open-access article distributed under the terms of the Creative Commons Attribution License, which permits unrestricted use, distribution, and reproduction in any medium, provided the original author and source are credited.

**Funding:** This work was supported in part by a grant from the Fonds de la recherche en santé du Québec and the Canadian Institutes of Health Research to RJ and NG. And, no additional external funding was received for this study. Further, the funders had no role in study design, data collection and analysis, decision to publish, or preparation of the manuscript.

**Competing Interests:** Dr. Ridha Joobner sits on the advisory boards and speakers' bureaus of Pfizer Canada and Janssen Ortho Canada; he has received grant funding from them and from AstraZeneca. He has received honoraria from Janssen Ortho Canada for CME presentations and royalties for Henry Stewart talks. This does not alter the authors' adherence to all the PLOS ONE policies on sharing data and materials.

\* E-mail: ridha.joobner@douglas.mcgill.ca

<sup>9</sup> These authors contributed equally to this work.

## Introduction

Attention-Deficit/Hyperactivity Disorder (ADHD) is an etiologically complex, highly heritable, common childhood psychiatric disorder with approximately 5% prevalence worldwide [1]. It is characterized by age inappropriate patterns of severe and persistent inattention, hyperactivity, and impulsivity. ADHD often coexists with other psychiatric [2] and somatic disorders [3].

Recently, ADHD has been associated with body weight dysregulation [4,5]. Indeed, it has been reported that ADHD subjects show higher than average body mass index standard deviation scores, and have significantly higher percentage of body fat and abdominal circumference compared to controls [6,7]. Conversely, obese subjects are more likely to present with attention problems [8]. In addition, some evidence suggests that patients with eating disorders tend to have attention problems akin to ADHD [9,10].

From a psychological point of view, both ADHD and childhood obesity have been conceptualized as disorders of impaired self-regulation [11,12]. Self-regulation is a psychological construct encapsulating the means by which individuals manage themselves in order to attain adaptive goals [13]. This construct implicates emotional and cognitive, particularly executive function (EF) processes [14,15]. EF represent the neurocognitive processes important for goal-directed behaviours [16] including planning, sustained attention, cognitive flexibility, working memory, and response inhibition. Deficits in EF are believed to play an important role in ADHD. More specifically, ADHD children have shown significant impairments in different EF domains including response inhibition, vigilance, working memory, and planning [17]. Likewise, extremely obese individuals demonstrate significant differences in performances on tests of executive functioning such as planning, problem solving, and mental flexibility [18]. Similarly, in comparison to their peers, obese children exhibit significant cognitive deficits in their attention

shifting abilities [19]. Furthermore, in some studies, adults with elevated BMI display reduced cognitive performance [20]. However, in a recent large longitudinal study, obesity indices were differentially associated with performance on neuropsychological tests; while global cognitive function, memory and language ability were found to be associated with obesity indices, attention and visuospatial ability showed the reverse trends [21].

In addition to EFs, self-regulation depends critically on motivational systems that may be dysregulated in both ADHD and obesity. In this regard, mesolimbic dopaminergic neurotransmission has been firmly implicated in the regulation of saliency of behavioral tasks [22] and food stimuli [23]. It has been proposed that ADHD symptoms may be at least in part the consequence of reduced dopamine (DA) signaling in the mesolimbic system, resulting in reduced saliency of tasks [24] and aversion to delayed gratification [25]. This emotional style may result in preferring immediate rewards and being less sensitive to reinforcement schedules [26,27], and consequently may contribute to abnormal

eating habits [28] and promote inclination towards readily available non-healthy food in patients with ADHD. Similarly, pathological eating behavior (food addiction) in obese individuals has been conceptualized as a reaction compensating for a dampened DA reward system [29,30]. Under this scenario, excessive food intake may result in elevated dopamine activation in the mesolimbic pathway leading to a rewarding experience [31,32].

These neurocognitive/emotional parallels between ADHD and obesity are also supported by neuroimaging studies in ADHD and obese subjects [33,34,35,36]. Further, it is also noticeable that psychostimulant medications, used to treat ADHD symptoms, also reduce appetite [37,38]. These observations taken together suggest that the neurobiological pathways implicated in the regulation of attention and motor control are also important determinants of energy intake and eating behaviors [39,40]. While the literature linking ADHD to body weight regulation is rich in neuropsychological hypotheses attempting to explain the link between these

**Table 1.** Demographic and baseline characteristics of ADHD children stratified according to three BMI categories.

|                                                             | Normal-weight<br>n = 168 | Over-weight<br>n = 57 | Obese n = 59     | Test statistic, p-value,<br>post hoc comparison | Effect size (Cohen's <i>d</i> ) |                         |
|-------------------------------------------------------------|--------------------------|-----------------------|------------------|-------------------------------------------------|---------------------------------|-------------------------|
|                                                             |                          |                       |                  |                                                 | Normal-weight vs. Over-weight   | Normal-weight vs. Obese |
| <b>Subject characteristics</b>                              |                          |                       |                  |                                                 |                                 |                         |
| Gender (% males)                                            | 75.0%                    | 66.7%                 | 78.0%            | $X^2 = 2.15$ , $df = 2$ ,<br>$p = 0.34$         |                                 |                         |
| Age                                                         | 9.01 ± 1.86              | 9.08 ± 1.80           | 9.6 ± 1.86       | $F_{2,281} = 2.23$ , $p = 0.10$                 | -0.03                           | -0.31                   |
| Handedness (Rt/lft/amb.)                                    | 150/18/0                 | 50/7/0                | 49/8/2           | $X^2 = 8.15$ , $df = 4$ ,<br>$p = 0.08$         |                                 |                         |
| Birth weight (gms)                                          | 3396.90 ± 711.62         | 3541 ± 814.951        | 3269.56 ± 521.03 | $F_{2,126} = 1.04$ , $p = 0.35$                 | -0.18                           | 0.20                    |
| Previous medication status (% yes)                          | 36.1%                    | 25.0%                 | 20.3%            | $X^2 = 6.15$ , $df = 2$ ,<br>$p = 0.04$         |                                 |                         |
| <b>Family characteristics</b>                               |                          |                       |                  |                                                 |                                 |                         |
| Participating legal guardian (% mothers)                    | 82.9%                    | 82.1%                 | 91.4%            | $X^2 = 2.64$ , $df = 2$ ,<br>$p = 0.26$         |                                 |                         |
| Mother's age at child's birth                               | 29.51 ± 5.84             | 28.60 ± 7.10          | 26.58 ± 4.72     | $F_{2,261} = 5.14$ ,<br>$p = 0.006$ , †         | 0.13                            | 0.55                    |
| Mother's years of education                                 | 13.87 ± 3.28             | 13.27 ± 3.09          | 13.51 ± 2.53     | $F_{2,245} = 0.77$ , $p = 0.46$                 | 0.18                            | 0.12                    |
| Maternal alcohol during pregnancy (% yes)                   | 24.0%                    | 18.8%                 | 16.7%            | $X^2 = 1.52$ , $df = 2$ ,<br>$p = 0.46$         |                                 |                         |
| Maternal smoking during pregnancy (# of cigarettes per day) | 2.43 ± 5.52              | 4.93 ± 7.73           | 3.71 ± 6.21      | $F_{2,248} = 3.26$ ,<br>$p = 0.04$ , †          | -0.37                           | -0.21                   |
| Adopted (% yes)                                             | 5.4%                     | 3.6%                  | 0.0%             | $X^2 = 3.39$ , $df = 2$ ,<br>$p = 0.18$         |                                 |                         |
| Father's years of education                                 | 13.14 ± 3.43             | 12.41 ± 3.59          | 12.32 ± 3.51     | $F_{2,202} = 1.19$ , $p = 0.30$                 | 0.20                            | 0.23                    |
| Father's age at child's birth                               | 31.95 ± 6.03             | 30.61 ± 7.17          | 28.94 ± 5.26     | $F_{2,233} = 4.55$ ,<br>$p = 0.01$ , †          | 0.20                            | 0.53                    |
| Annual family income (% less than \$20,000)                 | 13.4%                    | 29.1%                 | 24.1%            | $X^2 = 7.84$ , $df = 2$ ,<br>$p = 0.01$         |                                 |                         |

\*Values are mean ± SD unless otherwise specified. Rt = right, lft = left, amb = ambidextrous, gms = grams, # = number. Significant Post Hoc pairwise comparison nomenclature; † = normal vs. over-weight, ‡ = normal vs. obese.

doi:10.1371/journal.pone.0055351.t001

two complex disorders, the experimental data supporting these theories is very limited. To our knowledge, only one study reported an association between body weight and EF in children with ADHD [12]. In addition, the association between ADHD and body mass dysregulation could be due to many factors shared by these two conditions. Childhood socioeconomic adversity has been shown to impact both ADHD [41,42] and obesity [43]. More specifically, in a national cohort study with a sample of 7,960 children (aged 6–19 years), familial socioeconomic adversity factors including low maternal education level, single parent status and being recipient of social welfare predicted medicated status in school children with ADHD [42]. Likewise, in developed countries, groups belonging to low socioeconomic status (SES) are more likely to be obese compared to other SES groups [44,45,46].

The present study aims at testing the hypothesis that self-regulation deficits are associated with obesity in children with ADHD. Further, our study controls for socioeconomic status, consists of a large sample size, and utilizes a comprehensive assessment battery.

## Methods

### Ethics Statement

The research protocol was approved by the Research Ethics Board of the Douglas Mental Health University Institute (DMHUI). Children with ADHD and their parents were explained the study procedures in detail, and provided verbal assent and written consent respectively.

### Subjects and study procedure

Two hundred and eighty four children with ADHD (210 males and 74 females), ages 6–12 [mean = 9.15; SD = 1.86], were recruited from the severe disruptive behaviours program and ADHD outpatient clinic at the DMHUI. These children were referred to the aforementioned secondary care mental health facilities from different sources including, school teachers, pediatricians, family physicians, and community social workers. Thus the children participating in the current study are reflective of the general ADHD population.

All children included in this study met DSM-IV diagnosis criteria for ADHD. A comprehensive clinical evaluation was used to establish the diagnosis of ADHD [see details in [47]]. Children were excluded from this study if they had an IQ less than 70 on the Wechsler Intelligence Scale for Children-III/IV (WISC-III or WISC-IV), Tourette syndrome, pervasive developmental disorder, or psychosis. These subjects were excluded from the study in-order to reduce the potential confounding of cognitive and weight by the afore-mentioned medical conditions, which have been associated with weight gain [48,49,50] and cognitive anomalies [51,52,53,54].

Among the total sample of affected ADHD children, 73.9% were male, and 18.0% belonged to families with an annual income of less than CN\$20,000, 49.3% met DSM-IV criteria for the combined subtype, 42.3% were diagnosed with the inattentive and 8.1% with the hyperactive subtypes of ADHD. A total of 30.3% were previously receiving medication for their ADHD symptoms and the rest were medication naive. Among comorbid disorders, 41.9% had oppositional defiant disorder, 11.3% had conduct disorder (CD), and 40.1% had an anxiety disorder.

All the clinical and self-regulation assessments were completed while the children were not taking any medication. In cases where children were on medication prior to their inclusion in the study,

these assessments were carried out at the end of a one-week washout period.

### Self-regulation evaluations

**Neurocognitive performance.** A comprehensive neuropsychological (NP) battery of tests specifically designed for children was used to study different executive function domains. Amongst the NP test battery, the Wechsler Intelligence Scale (WISC) [55] evaluates the full scale (FS), verbal (V), and performance (P) IQ; the Wisconsin Card Sorting Test (WCST) [56] assesses cognitive flexibility and set-shifting; the Finger Windows (FW) subtest [57] assesses visual-spatial working memory; the Tower of London (TOL) [58] evaluates planning, organization, and problem-solving capacity; the Self-Ordered Pointing Task (SOPT) estimates working memory, planning, and response inhibition [59]; the Conners' Continuous Performance Test (CPT) [60] measures attention, response inhibition, and impulse control; and the Stroop (colour and word) test evaluates cognitive flexibility, and resistance to interference from outside stimuli [61]. The details regarding NC task assessments and procedures have been described in detail in a previous study [62].

**Motivational style.** Motivational style was first evaluated by using the choice delay task (CDT), a test specifically designed to assess the ADHD children's aversion to delay [63]. In the CDT, the child repetitively (20 trials) chose between two reward paradigms; a large reward of 2 points (exchanged for 7 or 10 cents) associated with a large period of delay (30 sec), and a smaller reward of 1 point (exchanged for 5 cents) associated with a smaller period of delay (2 sec). However, once the participant chose a particular reward paradigm, he/she cannot switch back to the alternative reward paradigm until the next trial [63].

In addition to the CDT, the Restricted Academic Situation Scale (RASS) [64] was used to systematically observe and record the child's engagement in an assigned independent academic task (a set of math problems) in the presence of potential distractions, with no adult supervision [65]. Task engagement/disengagement, is a distinct trait of ADHD [66,67] and it is also a good predictor of the child's motivation during a monotonous and repetitive task. The RASS assessment was conducted in a specialized room within the clinic equipped with a worktable, a chair, an intercom, and some toys. The child was given a set of math problems at current grade and instructed to complete as many as possible. The instructor then left the room and assessed the child's behaviour from behind a one-way mirror over a 15 minute time period. All behavioural events were recorded at 30-second intervals according to five categories: 'off-task', 'playing with objects', 'out of seat', 'vocalizing', and 'fidgeting'.

**Motor activity.** On the day of the testing, overall motor activity of children with ADHD was evaluated using actigraphy using a small electronic device (Actiwatch®) worn on the non-dominant hand, which is sensitive to acceleration. It records the subject's movements each 30 sec time period and expresses it as motor activity counts. Patients put on the Actiwatch® in the morning and kept it until the end of their testing in the early afternoon. The average motor activity was calculated and considered in the analyses as reflective of the overall motor activity of the child.

### Anthropometrics

All anthropometric measurements were taken by trained research assistants. Height of children with ADHD was measured using a wall-mounted chart with the subjects being bare-footed. Similarly, body weight was measured using a doctor's clinical scale with subjects clad in regular casual attire and being bare-footed.

**Table 2.** Neurocognitive features of ADHD children stratified according to BMI categories.

|                                    | Normal-weight<br>n = 168 | Over-weight<br>n = 57 | Obese n = 59 | Test statistic<br>and p-value       | Effect size (Cohen's <i>d</i> )      |                                   |
|------------------------------------|--------------------------|-----------------------|--------------|-------------------------------------|--------------------------------------|-----------------------------------|
|                                    |                          |                       |              |                                     | Normal- weight<br>vs.<br>Over-weight | Normal-<br>weight<br>vs.<br>Obese |
| <b>Neurocognitive evaluation</b>   |                          |                       |              |                                     |                                      |                                   |
| <i>WISC-III</i>                    |                          |                       |              |                                     |                                      |                                   |
| verbal IQ                          | 96.53±13.53              | 97.37±14.37           | 94.63±14.61  | F <sub>2,185</sub> = 1.27, p = 0.28 | -0.06                                | 0.13                              |
| performance IQ                     | 103.74±13.79             | 101.16±14.61          | 99.45±15.97  | F <sub>2,185</sub> = 0.83, p = 0.43 | 0.18                                 | 0.28                              |
| full-scale IQ                      | 96.81±12.27              | 96.82±13.47           | 93.82±12.45  | F <sub>2,185</sub> = 0.94, p = 0.39 |                                      | 0.24                              |
| <i>Wisconsin Card Sorting Test</i> |                          |                       |              |                                     |                                      |                                   |
| Perseverative errors (s score)     | 97.58±13.23              | 99.37±15.24           | 96.91±10.90  | F <sub>2,190</sub> = 0.36, p = 0.69 | -0.00                                | 0.05                              |
| Non-Perseverative errors (s score) | 92.25±15.90              | 96.94±17.35           | 95.63±15.04  | F <sub>2,190</sub> = 1.56, p = 0.21 | -0.28                                | -0.21                             |
| Total errors (s score)             | 94.31±14.50              | 96.86±15.00           | 96.12±12.98  | F <sub>2,190</sub> = 0.47, p = 0.62 | -0.17                                | -0.13                             |
| number of categories completed     | 4.14±1.92                | 4.40±2.06             | 4.30±1.79    | F <sub>2,190</sub> = 0.31, p = 0.73 | -0.13                                | -0.08                             |
| Failure to maintain set            | 1.48±1.29                | 1.66±1.51             | 1.86±2.01    | F <sub>2,190</sub> = 1.15, p = 0.31 | -0.12                                | -0.22                             |
| <i>WRAML Finger Windows</i>        |                          |                       |              |                                     |                                      |                                   |
| Standard score                     | 9.74±2.89                | 10.23±3.25            | 9.68±2.63    | F <sub>2,204</sub> = 0.90, p = 0.40 | -0.15                                | 0.02                              |
| <i>Tower of London</i>             |                          |                       |              |                                     |                                      |                                   |
| Standard Score                     | 110.39±15.49             | 112.11±13.22          | 107.61±18.40 | F <sub>2,182</sub> = 0.97, p = 0.37 | -0.11                                | 0.16                              |
| <i>Self-Ordered Pointing Test</i>  |                          |                       |              |                                     |                                      |                                   |
| Total score                        | 16.98±7.61               | 16.33±7.13            | 15.77±7.06   | F <sub>2,204</sub> = 0.66, p = 0.51 | 0.08                                 | 0.16                              |
| <i>Stroop Test</i>                 |                          |                       |              |                                     |                                      |                                   |
| Word score (t score)               | 51.37±9.15               | 51.69±9.64            | 49.83±7.36   | F <sub>2,172</sub> = 0.36, p = 0.69 | -0.03                                | 0.18                              |
| Color score (t score)              | 48.79±6.62               | 48.41±7.37            | 47.75±5.42   | F <sub>2,172</sub> = 0.20, p = 0.81 | 0.05                                 | 0.17                              |
| Color-Word Score (t-Score)         | 44.73±8.60               | 44.78±7.60            | 44.15±8.01   | F <sub>2,172</sub> = 0.12, p = 0.88 | -0.006                               | 0.06                              |
| Interference score (t score)       | 52.56±8.50               | 52.13±7.10            | 51.60±7.49   | F <sub>2,172</sub> = 0.06, p = 0.93 | 0.05                                 | 0.11                              |
| <i>Continuous Performance Test</i> |                          |                       |              |                                     |                                      |                                   |
| Omissions (t-score)                | 58.42±16.35              | 57.01±15.67           | 57.35±17.76  | F <sub>2,200</sub> = 0.36, p = 0.69 | 0.08                                 | 0.06                              |
| Commissions (t-score)              | 54.33±8.24               | 55.24±7.02            | 53.65±8.45   | F <sub>2,200</sub> = 0.59, p = 0.55 | -0.11                                | 0.08                              |
| Hit response time (t-score)        | 53.93±12.24              | 51.34±11.08           | 53.88±11.77  | F <sub>2,200</sub> = 1.57, p = 0.21 | 0.22                                 | 0.004                             |
| Hit response time standard error   | 59.61±10.83              | 56.99±10.51           | 58.20±10.52  | F <sub>2,200</sub> = 1.97, p = 0.14 | 0.24                                 | 0.13                              |
| Variability of standard errors     | 58.24±9.64               | 56.31±9.10            | 57.11±10.08  | F <sub>2,200</sub> = 1.12, p = 0.32 | 0.24                                 | 0.11                              |
| Response style (t-score)           | 53.36±9.64               | 52.61±9.74            | 51.62±7.55   | F <sub>2,200</sub> = 0.60, p = 0.54 | 0.07                                 | 0.20                              |
| Perseveration                      | 76.81±39.39              | 76.04±36.48           | 68.71±36.01  | F <sub>2,200</sub> = 0.74, p = 0.47 | 0.02                                 | 0.21                              |
| Hit RT block change                | 52.90±11.84              | 51.86±13.12           | 49.98±13.83  | F <sub>2,200</sub> = 0.84, p = 0.43 | 0.08                                 | 0.22                              |
| Hit SE block change                | 52.72±9.59               | 52.21±10.42           | 49.14±11.84  | F <sub>2,200</sub> = 1.59, p = 0.20 | 0.05                                 | 0.33                              |
| Overall index                      | 7.24±10.08               | 4.70±7.03             | 6.27±9.86    | F <sub>2,200</sub> = 1.92, p = 0.14 | 0.29                                 | 0.09                              |

\*Values are mean ± SD unless otherwise specified. WISC-III = Wechsler Intelligence Scale for Children 3rd edition scores. S scores = standardized Scores.  
doi:10.1371/journal.pone.0055351.t002

### Calculation of Body Mass Index (BMI) and definition of weight categories

Body mass index (BMI) is a simple index of weight-for-height used to classify children into normal, overweight and obese categories. It is defined as "weight in kilograms divided by the square of the height in meters (kg/m<sup>2</sup>)". BMI was calculated for all children with ADHD, and then converted to age- and gender-specific percentiles according to the criterion available in the World Health Organization (WHO) website (<http://www.who>.

<http://www.who>). The WHO defines "normal weight" as ranging between 3<sup>rd</sup> to 84<sup>th</sup> percentile, "overweight" as ranging between 85<sup>th</sup> to 96<sup>th</sup> percentile, and "obesity" as equal or greater than 97<sup>th</sup> percentile.

### Statistical Methods

Statistical analyses were performed with SPSS 15.0 version for Windows. Subjects were stratified into three groups according to the Weight/BMI classification as per WHO criterion. First,

**Table 3.** Motivational style and Motor traits of ADHD children stratified according to BMI categories.

|                                      | Normal-weight<br>n = 168 | Over-weight<br>n = 57 | Obese n = 59 | Test statistic<br>and p-value | Effect size (Cohen's <i>d</i> )      |                            |
|--------------------------------------|--------------------------|-----------------------|--------------|-------------------------------|--------------------------------------|----------------------------|
|                                      |                          |                       |              |                               | Normal- weight<br>vs.<br>Over-weight | Normal- weight<br>vs.Obese |
| <b>Motivational style evaluation</b> |                          |                       |              |                               |                                      |                            |
| <i>Choice Delay Task</i>             |                          |                       |              |                               |                                      |                            |
| Total score                          | 28.98±5.20               | 28.43±5.61            | 28.98±5.78   | $F_{2,201} = 0.16, p = 0.84$  | 0.10                                 | 0.00                       |
| <i>Task-engagement Traits</i>        |                          |                       |              |                               |                                      |                            |
| RASS total score                     | 55.22±25.50              | 54.05±26.79           | 50.83±28.45  | $F_{2,199} = 0.22, p = 0.80$  | 0.04                                 | -0.57                      |
| RASS vocalization<br>score           | 6.55±7.48                | 6.33±7.07             | 6.24±8.41    | $F_{2,199} = 0.32, p = 0.96$  | 0.03                                 | 0.03                       |
| RASS fidgeting score                 | 12.84±7.09               | 13.61±8.47            | 14.32±7.22   | $F_{2,199} = 1.35, p = 0.26$  | -0.09                                | -0.20                      |
| RASS off task score                  | 15.02±8.76               | 13.87±9.83            | 13.37±8.58   | $F_{2,199} = 0.46, p = 0.63$  | 0.12                                 | 0.19                       |
| RASS plays with<br>object score      | 14.75±8.55               | 14.47±9.01            | 12.97±8.67   | $F_{2,199} = 0.40, p = 0.67$  | 0.03                                 | 0.20                       |
| RASS out of seat<br>score            | 5.97±5.95                | 5.75±6.44             | 3.97±5.30    | $F_{2,199} = 1.99, p = 0.13$  | 0.03                                 | 0.35                       |
| <b>Motor activity evaluation</b>     |                          |                       |              |                               |                                      |                            |
| <i>Actigraphy testing</i>            |                          |                       |              |                               |                                      |                            |
| Motor activity (Av.<br>score)        | 85.23±42.68              | 97.67±47.95           | 81.76±58.41  | $F_{2,190} = 0.96, p = 0.38$  | -0.27                                | 0.06                       |
| Motor activity (SD.<br>score)        | 93.33±39.65              | 100.60±40.67          | 86.57±43.51  | $F_{2,190} = 0.85, p = 0.42$  | -0.18                                | 0.16                       |

\*Values are mean ± SD unless otherwise specified. Scores = standardized Scores. RASS = Restricted Academic Situation Scale. Av. Scores = average score, SD. Scores = standard deviation score.  
doi:10.1371/journal.pone.0055351.t003

demographic and baseline characteristics of children with ADHD were compared between the three groups, namely normal (n = 168), overweight (n = 57), and obese (n = 59). Socio-demographic variables associated with BMI at a significance level of  $p < 0.05$  were used as covariates in subsequent analyses. Second, neurocognitive, emotional and motor outcome measures were compared between three weight/BMI groups using univariate ANOVA for continuous variables and chi-squared tests for categorical variables. Main effects were further explored by Post Hoc pairwise comparisons and the Bonferroni correction was used to protect from type I error.

## Results

As shown in Table 1, the three groups of children were not different with regard to age, gender, handedness or birth weight. However, mothers and fathers of children in the obese and overweight groups were significantly younger at the birth of their children ( $F_{2,261} = 5.14, p = 0.006$ ;  $F_{2,233} = 4.55, p = 0.01$ , respectively; all pair-wise p-values comparing the normal weight group to the other two groups were  $\leq 0.01$ ). In addition, compared to others, children in the overweight and obese groups belonged to a lower family income group ( $\chi^2 = 7.84, df = 2, p = 0.01$ ), and were also exposed to higher severity of maternal smoking during pregnancy (MSDP; # of cigarettes per day;  $F_{2,248} = 3.26, p = 0.04$ ).

With regards to previous medication status, ADHD children within the obese group were significantly less likely to be previously on medication (20.3%) compared to subjects in the overweight (25.0%), and normal weight (36.1%) groups ( $\chi^2 = 6.15, df = 2, p = 0.04$ ; Table 1). This finding is in line with previous data

indicating that stimulant medication in ADHD subjects may result in weight loss due to suppression of appetite [68,69].

All subsequent analyses were conducted while controlling for aforementioned SES factors (parental age at child birth, family income status, and MSDP) and prior history of treatment with psychostimulants.

Additionally, as shown in Table 2, neurocognitive features as assessed by the WISC-III, WCST, TOL, SOPT, FW, CPT, and Stroop were not significantly different between the three groups (all  $p > 0.05$ ). Further, no significant differences between the groups were found in emotional/motivational style as evaluated by the CDT and the RASS respectively (all  $p > 0.05$ ; Table 3). Finally, the three groups were not significantly different with regards to motor activity as evaluated by actigraphy (all  $p > 0.05$ ; Table 3).

## Discussion

It has been reported that children with ADHD have elevated risk for obesity in both epidemiological [38] and clinical samples [37,70,71]. Given the well established health risks associated with childhood obesity [72,73], it is important to understand the socio-demographic, neuropsychological and emotional determinants of the relation between obesity and ADHD.

Different theoretical models have proposed that ADHD and body mass regulation disorders share common pathophysiological underpinnings. From a neuropsychological point of view, it is suggested that ADHD and obesity stem from impairments in individual's self-regulation [11,12]. More specifically, deficits in Executive Functions [13,74], dysfunctional motivational regulation systems [75] and aberrant goal directed motor activity regulated by brain dopamine systems are believed to be implicated

in both disorders. Supporting this line of argument, neuroimaging data in ADHD and obese subjects report commonality in brain structural abnormalities, including in the frontal cortex [33,34,35,36], a locus considered to be important for self-regulation and EFs. In addition, ADHD subjects have been shown to have reduced DA receptor binding capacity in the hypothalamus, which controls for satiety and hunger [76].

The primary objective of the present study was to investigate the relation between body weight and cognitive, emotional, and motor activity characteristics in a large sample of children with ADHD. Results from our study do not identify statistically significant differences between weight groups (normal, over, and obese categories) in children with ADHD with respect to neurocognitive measures tapping in executive functions, motivational style indices, and overall motor activity. These findings contrast with the results of the only other study examining the association between EF and weight in children with ADHD [12]. More specifically, Graziano et al (2011) showed that children who performed poorly on a neuropsychological battery had greater BMI  $z$ -scores (overweight and obese) compared with children who performed better on the neuropsychological battery. Several factors may explain this discrepancy between the two studies. Compared to Graziano and colleagues, the current study has a much larger sample size ( $n = 80$  versus  $n = 284$ ), the participants have a narrower age range (4.5–18 years versus 6–12 years), and the neurocognitive assessment is more comprehensive in the present study. Unlike Graziano and colleagues, our participants were not taking any psychostimulant medication for at least one week prior to the neurocognitive assessments. Further, our statistical analysis model used parental (both mothers and fathers) age at child birth, family income status, MSDP, and prior history of treatment with psychostimulants as covariates to prevent potential confounding effects on the result outcomes, which was not the case in Graziano et al. study. In addition, the use of different neuropsychological tests indexing various EF domains in children with ADHD could also contribute to incongruent results. Contrary to Graziano et al. study where all cognitive domains were reduce into one single factor, in the present study; we elected to explore separately all performances assessed by various tests in order to identify any specific differences between the three groups. These analyses did not identify any significant differences, including in neuropsychological tests common to our study and Graziano and colleagues' work (Color-Word Interference Test).

The present study identified a strong association between socioeconomic (SE) characteristics and overweight and obesity status in children with ADHD, including parental age at child birth, MSDP and annual family income. These results are in line with results of previous reports in children from the general population exploring the role of socioeconomic, geographic and environmental factors in influencing body weight gain and fat distribution [43]. In developed countries, low SES strongly predicts obesity [77,78] and the largest increase in obesity is observed in individuals living within the defined range of poverty [79]. Further, several lifestyle factors associated with obesity have a strong impact on children and adolescents belonging to low SES [80,81,82]. For instance, younger children having limited accesses to healthy foods, recreational venues and safe housing are 20–60% more likely to be obese/overweight compared to others [83,84,85,86]. Due to increased financial burden, low SES

families may not be able to afford to pay for their children's involvement in any formal sport/recreation activities, and these children may have limited access to safer parks or recreational facilities because they reside in poor neighborhoods [87]. This activity limitation prevents low SES child's engagement in a healthy, active lifestyle, and thus increases the chances of being overweight relative to their affluent high SES peers. Additionally, a diet with fruits and vegetables is highly recommended as part of a healthy lifestyle for growing children, but this may be less affordable for low SES families, resulting in poor nutrition and unhealthy weight gain. Consequently, it is plausible that lower SES is the main risk factor promoting overweight/obesity in children with ADHD.

Like ADHD [88,89], weight gain/obesity is a multifaceted phenotype depending on complex interactions between genetic and environmental factors [5,90]. More research in larger independent samples is recommended to further explore the complex relations between gene-environment-obesity amongst children with ADHD.

Our study has a number of strengths. First, to our knowledge, this is the largest and most comprehensive study examining the relations between weight status/BMI and neurocognitive profiles, motivational status and motor activity in children with ADHD. In addition, all clinical, neurocognitive, motivational and motor activity assessments were carried out while the children were not taking any medication (1 week wash out period).

The main limitations of this study also need to be considered. This study could not investigate the moderating effects of physical activity patterns [91] and eating habits/preferences [92] on the relation between body weight and ADHD due to unavailability of data. Future studies should address this issue, given the link between physical activity, eating preferences, obesity and ADHD. Further, our research design investigated BMI which is a generalized measure of body mass and lacked more direct and objective measures of obesity for example, underwater weighing, skin folds, etc. Finally, a link between altered sleep patterns, obesity and ADHD has been recently suggested [93,94], given the unavailability of the sleep data in this sample, we could not investigate this potential interaction.

To summarize, our results show that childhood obesity in ADHD is associated with specific socioeconomic characteristics but not associated with impairments in self-regulation characteristics. These results do not support previous theories suggesting that impaired self-regulation promotes obesity in ADHD. Consequently, changing unhealthy life style amongst low SES children should receive more attention in future research, particularly those aiming at preventing childhood obesity amongst ADHD with children.

## Acknowledgments

We would like to thank Rosherrrie de Guzman, Johanne Bellingham, Marina Ter Stepanian, Anna Polotskaia, Sandra Robinson, and Jacqueline Richard for technical and clinical assistance.

## Author Contributions

Conceptual Statistical Input: NS. Conceived and designed the experiments: RJ NG. Performed the experiments: ZC MEF SS WJH. Analyzed the data: ZC. Wrote the paper: ZC RJ.

## References

1. Polanczyk G, de Lima MS, Horta BL, Biederman J, Rohde LA (2007) The worldwide prevalence of ADHD: a systematic review and meta-regression analysis. *Am J Psychiatry* 164: 942–948.
2. Rader R, McCauley L, Callen EC (2009) Current strategies in the diagnosis and treatment of childhood attention-deficit/hyperactivity disorder. *American family physician* 79: 657–665.

3. van den Heuvel E, Starreveld JS, de Ru M, Krauwier V, Versteegh FG (2007) Somatic and psychiatric co-morbidity in children with attention deficit hyperactivity disorder. *Acta paediatrica* 96: 454–456.
4. Surman CB, Randall ET, Biederman J (2006) Association between attention-deficit/hyperactivity disorder and bulimia nervosa: analysis of 4 case-control studies. *J Clin Psychiatry* 67: 351–354.
5. Cortese S, Vincenzi B (2012) Obesity and ADHD: Clinical and Neurobiological Implications. Current topics in behavioral neurosciences 9: 199–218.
6. Ptacek R, Kuzelova H, Paclt I, Zukov I, Fischer S (2009) ADHD and growth: anthropometric changes in medicated and non-medicated ADHD boys. *Medical science monitor: international medical journal of experimental and clinical research* 15: CR595–599.
7. Ptacek R, Kuzelova H, Paclt I, Zukov I, Fischer S (2009) Anthropometric changes in non-medicated ADHD boys. *Neuro endocrinology letters* 30: 377–381.
8. Agranat-Meged AN, Deitcher C, Goldzweig G, Leibenson L, Stein M, et al. (2005) Childhood obesity and attention deficit/hyperactivity disorder: a newly described comorbidity in obese hospitalized children. *The International journal of eating disorders* 37: 357–359.
9. Hudson JL, Hiripi E, Pope HG Jr, Kessler RC (2007) The prevalence and correlates of eating disorders in the National Comorbidity Survey Replication. *Biol Psychiatry* 61: 348–358.
10. Rosval L, Steiger H, Bruce K, Israel M, Richardson J, et al. (2006) Impulsivity in women with eating disorders: problem of response inhibition, planning, or attention? *The International journal of eating disorders* 39: 590–593.
11. Francis LA, Susman EJ (2009) Self-regulation and rapid weight gain in children from age 3 to 12 years. *Archives of pediatrics & adolescent medicine* 163: 297–302.
12. Graziano PA, Bagner DM, Waxmonsky JG, Reid A, McNamara JP, et al. (2011) Co-occurring weight problems among children with attention deficit/hyperactivity disorder: the role of executive functioning. *International journal of obesity*.
13. Barkley RA (2010) Differential diagnosis of adults with ADHD: the role of executive function and self-regulation. *J Clin Psychiatry* 71: e17.
14. Calkins SD (2007). *Socioemotional development in the toddler years: Transitions and transformations*. New York, NY: Guilford Press. 261–284.
15. Calkins SD, Fox NA (2002) Self-regulatory processes in early personality development: a multilevel approach to the study of childhood social withdrawal and aggression. *Development and psychopathology* 14: 477–498.
16. Pennington BF, Ozonoff S (1996) Executive functions and developmental psychopathology. *Journal of child psychology and psychiatry, and allied disciplines* 37: 51–87.
17. Willcutt EG, Doyle AE, Nigg JT, Faraone SV, Pennington BF (2005) Validity of the executive function theory of attention-deficit/hyperactivity disorder: a meta-analytic review. *Biol Psychiatry* 57: 1336–1346.
18. Boeka AG, Lokken KL (2008) Neuropsychological performance of a clinical sample of extremely obese individuals. *Archives of clinical neuropsychology: the official journal of the National Academy of Neuropsychologists* 23: 467–474.
19. Cserjesi R, Molnar D, Luminet O, Lenard L (2007) Is there any relationship between obesity and mental flexibility in children? *Appetite* 49: 675–678.
20. Gunstad J, Paul RH, Cohen RA, Tate DF, Spitznagel MB, et al. (2007) Elevated body mass index is associated with executive dysfunction in otherwise healthy adults. *Comprehensive psychiatry* 48: 57–61.
21. Gunstad J, Lhotsky A, Wendell CR, Ferrucci L, Zonderman AB (2010) Longitudinal examination of obesity and cognitive function: results from the Baltimore longitudinal study of aging. *Neuroepidemiology* 34: 222–229.
22. Bromberg-Martin ES, Matsumoto M, Hikosaka O (2010) Dopamine in motivational control: rewarding, aversive, and alerting. *Neuron* 68: 815–834.
23. Ungless MA (2004) Dopamine: the salient issue. *Trends in neurosciences* 27: 702–706.
24. Volkow ND, Wang GJ, Fowler JS, Ding YS (2005) Imaging the effects of methylphenidate on brain dopamine: new model on its therapeutic actions for attention-deficit/hyperactivity disorder. *Biol Psychiatry* 57: 1410–1415.
25. Sonuga-Barke EJ (2005) Causal models of attention-deficit/hyperactivity disorder: from common simple deficits to multiple developmental pathways. *Biol Psychiatry* 57: 1231–1238.
26. Luman M, Oosterlaan J, Sergeant JA (2005) The impact of reinforcement contingencies on AD/HD: a review and theoretical appraisal. *Clinical psychology review* 25: 183–213.
27. Volkow ND, Wang GJ, Fowler JS, Telang F, Maynard L, et al. (2004) Evidence that methylphenidate enhances the saliency of a mathematical task by increasing dopamine in the human brain. *Am J Psychiatry* 161: 1173–1180.
28. Davis C, Levitan RD, Smith M, Tweed S, Curtis C (2006) Associations among overeating, overweight, and attention deficit/hyperactivity disorder: a structural equation modelling approach. *Eating behaviors* 7: 266–274.
29. Stice E, Spoor S, Bohon C, Small DM (2008) Relation between obesity and blunted striatal response to food is moderated by TaqIA A1 allele. *Science* 322: 449–452.
30. Wang Y (2001) Cross-national comparison of childhood obesity: the epidemic and the relationship between obesity and socioeconomic status. *International journal of epidemiology* 30: 1129–1136.
31. Huang XF, Yu Y, Zavitsanou K, Han M, Storlien L (2005) Differential expression of dopamine D2 and D4 receptor and tyrosine hydroxylase mRNA in mice prone, or resistant, to chronic high-fat diet-induced obesity. *Brain research Molecular brain research* 135: 150–161.
32. Kelley AE (2004) Ventral striatal control of appetitive motivation: role in ingestive behavior and reward-related learning. *Neuroscience and biobehavioral reviews* 27: 765–776.
33. Valera EM, Faraone SV, Murray KE, Seidman IJ (2007) Meta-analysis of structural imaging findings in attention-deficit/hyperactivity disorder. *Biol Psychiatry* 61: 1361–1369.
34. Taki Y, Kinomura S, Sato K, Inoue K, Goto R, et al. (2008) Relationship between body mass index and gray matter volume in 1,428 healthy individuals. *Obesity* 16: 119–124.
35. Mana S, Paillere Martinot ML, Martinot JL (2010) Brain imaging findings in children and adolescents with mental disorders: a cross-sectional review. *European psychiatry: the journal of the Association of European Psychiatrists* 25: 345–354.
36. Raji CA, Ho AJ, Parikshak NN, Becker JT, Lopez OL, et al. (2010) Brain structure and obesity. *Human brain mapping* 31: 353–364.
37. Curtin C, Bandini LG, Perrin EC, Tybor DJ, Must A (2005) Prevalence of overweight in children and adolescents with attention deficit hyperactivity disorder and autism spectrum disorders: a chart review. *BMC pediatrics* 5: 48.
38. Waring ME, Lapan KL (2008) Overweight in children and adolescents in relation to attention-deficit/hyperactivity disorder: results from a national sample. *Pediatrics* 122: e1–6.
39. Schweickert LA, Strober M, Moskowitz A (1997) Efficacy of methylphenidate in bulimia nervosa comorbid with attention-deficit hyperactivity disorder: a case report. *The International journal of eating disorders* 21: 299–301.
40. Sokol MS, Gray NS, Goldstein A, Kaye WH (1999) Methylphenidate treatment for bulimia nervosa associated with a cluster B personality disorder. *The International journal of eating disorders* 25: 233–237.
41. Lasky-Su J, Faraone SV, Lange C, Tsuang MT, Doyle AE, et al. (2007) A study of how socioeconomic status moderates the relationship between SNPs encompassing BDNF and ADHD symptom counts in ADHD families. *Behavior genetics* 37: 487–497.
42. Hjerm A, Weitoft GR, Lindblad F (2010) Social adversity predicts ADHD-medication in school children—a national cohort study. *Acta paediatrica* 99: 920–924.
43. Orsi CM, Hale DE, Lynch JL (2011) Pediatric obesity epidemiology. *Current opinion in endocrinology, diabetes, and obesity* 18: 14–22.
44. Sobal J, Stunkard AJ (1989) Socioeconomic status and obesity: a review of the literature. *Psychological bulletin* 105: 260–275.
45. Wang GJ, Volkow ND, Logan J, Pappas NR, Wong CT, et al. (2001) Brain dopamine and obesity. *Lancet* 357: 354–357.
46. Wang Y, Monteiro C, Popkin BM (2002) Trends of obesity and underweight in older children and adolescents in the United States, Brazil, China, and Russia. *The American journal of clinical nutrition* 75: 971–977.
47. Grizenko N, Bhat M, Schwartz G, Ter-Stepanian M, Joobar R (2006) Efficacy of methylphenidate in children with attention-deficit hyperactivity disorder and learning disabilities: a randomized crossover trial. *Journal of psychiatry & neuroscience: JPN* 31: 46–51.
48. Olsson GM, Hulting AL (2010) Intellectual profile and level of IQ among a clinical group of obese children and adolescents. *Eating and weight disorders: EWD* 15: e68–73.
49. Comings DE, Comings BG (1990) A controlled family history study of Tourette's syndrome, II: Alcoholism, drug abuse, and obesity. *J Clin Psychiatry* 51: 281–287.
50. Curtin C, Anderson SE, Must A, Bandini L (2010) The prevalence of obesity in children with autism: a secondary data analysis using nationally representative data from the National Survey of Children's Health. *BMC pediatrics* 10: 11.
51. Geary DC, Hoard MK, Hamson CO (1999) Numerical and arithmetical cognition: patterns of functions and deficits in children at risk for a mathematical disability. *Journal of experimental child psychology* 74: 213–239.
52. Khalifa N, Dalan M, Rydell AM (2010) Tourette syndrome in the general child population: cognitive functioning and self-perception. *Nordic journal of psychiatry* 64: 11–18.
53. Bhattacharya A, Klann E (2012) The molecular basis of cognitive deficits in pervasive developmental disorders. *Learning & memory* 19: 434–443.
54. Reichenberg A (2005) Cognitive impairment as a risk factor for psychosis. *Dialogues in clinical neuroscience* 7: 31–38.
55. Weschler D (1992) *Weschler Intelligence Scale for Children: UK, 3 ed.*
56. Heaton RK, Chelune GI, Talley JL, Kay GG, Curtiss G (1993) *Wisconsin Card Sorting Test Manual*.
57. Sheslow D, Adams W (1990) *Wide Range Assessment of Memory and Learning: Administration Manual*. Wilmington, DE: Jastak Associates, Inc.
58. Shallice T (1982) *Specific Impairments of Planning*. 199–209.
59. Petrides M, Milner B (1982) Deficits on subject-ordered tasks after frontal- and temporal-lobe lesions in man. *Neuropsychologia* 20: 249–262.
60. Conners CK, Epstein JN, Angold A, Klaric J (2003) Continuous Performance Test Performance in a Normative Epidemiological Sample. *Journal of Abnormal Child Psychology* 31: 555–562.
61. Lansbergen MM, Kenemans JL, van Engeland H (2007) Stroop interference and attention-deficit/hyperactivity disorder: a review and meta-analysis. *Neuropsychology* 21: 251–262.
62. Thakur GA, Sengupta SM, Grizenko N, Schmitz N, Page V, et al. (2013) Maternal Smoking During Pregnancy and ADHD: A Comprehensive Clinical and Neurocognitive Characterization. *Nicotine & tobacco research: official journal of the Society for Research on Nicotine and Tobacco* 15: 149–157.

63. Sonuga-Barke EJ, Taylor E, Heptinstall E (1992) Hyperactivity and delay aversion-II. The effect of self versus externally imposed stimulus presentation periods on memory. *Journal of child psychology and psychiatry, and allied disciplines* 33: 399–409.
64. Barkley R (1990) *Attention Deficit Hyperactivity Disorder: a handbook for diagnosis and treatment*. New York, NY: The Guilford Press.
65. Fischer M, Newby RF (1998) Use of the restricted academic task in ADHD dose-response relationships. *Journal of learning disabilities* 31: 608–612.
66. Gupta R, Kar BR (2009) Development of attentional processes in ADHD and normal children. *Progress in brain research* 176: 259–276.
67. Karama S, Ben Amor L, Grizenko N, Ciampi A, Mbekou V, et al. (2009) Factor structure of the restricted academic situation scale: implications for ADHD. *Journal of attention disorders* 12: 442–448.
68. Schertz M, Adesman AR, Alfieri NE, Bienkowski RS (1996) Predictors of weight loss in children with attention deficit hyperactivity disorder treated with stimulant medication. *Pediatrics* 98: 763–769.
69. Poulton A, Cowell CT (2003) Slowing of growth in height and weight on stimulants: a characteristic pattern. *Journal of paediatrics and child health* 39: 180–185.
70. Chen AY, Kim SE, Houtrow AJ, Newacheck PW (2010) Prevalence of obesity among children with chronic conditions. *Obesity* 18: 210–213.
71. Holtkamp K, Konrad K, Muller B, Heussen N, Herpertz S, et al. (2004) Overweight and obesity in children with Attention-Deficit/Hyperactivity Disorder. *International journal of obesity and related metabolic disorders: journal of the International Association for the Study of Obesity* 28: 685–689.
72. Huang DY, Lanza HI, Wright-Volel K, Anglin MD (2012) Developmental trajectories of childhood obesity and risk behaviors in adolescence. *Journal of adolescence*.
73. Li S, Chen W, Srinivasan SR, Xu J, Berenson GS (2012) Relation of childhood obesity/cardiometabolic phenotypes to adult cardiometabolic profile: the Bogalusa Heart Study. *American journal of epidemiology* 176 Suppl 7: S142–149.
74. Welsh MC, Pennington BF (1988) *Assessing frontal lobe functioning in children: Views from developmental psychology*. Psychology Press. 199–230.
75. Sonuga-Barke EJ (2003) The dual pathway model of AD/HD: an elaboration of neuro-developmental characteristics. *Neuroscience and biobehavioral reviews* 27: 593–604.
76. Volkow ND, Swanson JM (2008) Does childhood treatment of ADHD with stimulant medication affect substance abuse in adulthood? *Am J Psychiatry* 165: 553–555.
77. McLaren L (2007) Socioeconomic status and obesity. *Epidemiologic reviews* 29: 29–48.
78. Caballero B (2007) The global epidemic of obesity: an overview. *Epidemiologic reviews* 29: 1–5.
79. Ogdan CL, Carroll MD, Kit BK, Flegal KM (2012) Prevalence of obesity in the United States, 2009–2010. *NCHS data brief*: 1–8.
80. Lieb DC, Snow RE, DeBoer MD (2009) Socioeconomic factors in the development of childhood obesity and diabetes. *Clinics in sports medicine* 28: 349–378.
81. Sanchez-Vaznaugh EV, Kawachi I, Subramanian SV, Sanchez BN, Acevedo-Garcia D (2009) Do socioeconomic gradients in body mass index vary by race/ethnicity, gender, and birthplace? *American journal of epidemiology* 169: 1102–1112.
82. Sanchez-Vaznaugh EV, Kawachi I, Subramanian SV, Sanchez BN, Acevedo-Garcia D (2008) Differential effect of birthplace and length of residence on body mass index (BMI) by education, gender and race/ethnicity. *Social science & medicine* 67: 1300–1310.
83. Singh GK, Siahpush M, Kogan MD (2010) Neighborhood socioeconomic conditions, built environments, and childhood obesity. *Health affairs* 29: 503–512.
84. Escaron AL (2009) Underserved communities have the highest need for built environment interventions targeting obesity. *American journal of public health* 99: 1159–1160.
85. Dunton GF, Berrigan D, Ballard-Barbash R, Graubard BI, Atienza AA (2009) Environmental influences on exercise intensity and duration in a U.S. time use study. *Medicine and science in sports and exercise* 41: 1698–1705.
86. Oreskovic NM, Kuhlthau KA, Romm D, Perrin JM (2009) Built environment and weight disparities among children in high- and low-income towns. *Academic pediatrics* 9: 315–321.
87. Oliver LN, Hayes MV (2005) Neighbourhood socio-economic status and the prevalence of overweight Canadian children and youth. *Canadian journal of public health Revue canadienne de sante publique* 96: 415–420.
88. Biederman J, Faraone SV (2005) Attention-deficit hyperactivity disorder. *Lancet* 366: 237–248.
89. Linnet KM, Dalsgaard S, Obel C, Wisborg K, Henriksen TB, et al. (2003) Maternal lifestyle factors in pregnancy risk of attention deficit hyperactivity disorder and associated behaviors: review of the current evidence. *Am J Psychiatry* 160: 1028–1040.
90. Snyder EE, Walts B, Perusse L, Chagnon YC, Weisnagel SJ, et al. (2004) The human obesity gene map: the 2003 update. *Obesity research* 12: 369–439.
91. Katz DL, Cushman D, Reynolds J, Njike V, Treu JA, et al. (2010) Putting physical activity where it fits in the school day: preliminary results of the ABC (Activity Bursts in the Classroom) for fitness program. *Preventing chronic disease* 7: A82.
92. Ebenegger V, Marques-Vidal PM, Munsch S, Quartier V, Nydegger A, et al. (2012) Relationship of hyperactivity/inattention with adiposity and lifestyle characteristics in preschool children. *Journal of child neurology* 27: 852–858.
93. Cortese S, Maffei C, Konofal E, Lecendreux M, Comencini E, et al. (2007) Parent reports of sleep/alertness problems and ADHD symptoms in a sample of obese adolescents. *J Psychosom Res* 63: 587–590.
94. Cortese S, Konofal E, Dalla Bernardina B, Mouren MC, Lecendreux M (2008) Does excessive daytime sleepiness contribute to explaining the association between obesity and ADHD symptoms? *Medical hypotheses* 70: 12–16.
